# Supplementary material for: Revision of the West Palaearctic Polistes Latreille, with the descriptions of two species – an integrative approach using morphology and DNA barcodes (Hymenoptera, Vespidae)
Source: Zookeys. 2017 Nov 2;(713):53–112. doi: 10.3897/zookeys.713.11335 (PMC5674218; doi:10.3897/zookeys.713.11335)
Supplement: Supplementary material 1 — List of voucher specimens [file zookeys-713-053-s001.xlsx]

## Sheet: Progress_Report
Supplementary file 1. List of voucher specimens with specimen ID, BOLD process ID, country of origin, GenBank accession code, sequencing success (COI-fragment length in bp, in square brackets number of unresolved bases) and, if present, Barcode Index Number (BIN).
Identification	Specimen ID	Process ID	Country	GenBank	COI-5P	BIN
Polistes albellus	BC ZSM HYM 05009	FBACA354-10	Germany	HQ947790	658[0n]	BOLD:AAN3553
Polistes albellus	BC ZSM HYM 05010	FBACA355-10	Germany	HQ947791	658[0n]	BOLD:AAN3553
Polistes albellus	BC ZSM HYM 05011	FBACA356-10	Germany	HQ947792	658[0n]	BOLD:AAN3553
Polistes albellus	BC ZSM HYM 05012	FBACA357-10	Germany	HQ947793	658[0n]	BOLD:AAN3553
Polistes albellus	BC ZSM HYM 15510	GBACU3730-13	Germany	KY260883	499[0n]	BOLD:AAN3553
Polistes albellus	BC ZSM HYM 15563	GBACU3783-13	Germany	KY260878	658[0n]	BOLD:AAN3553
Polistes albellus	BC ZSM HYM 15574	GBACU3794-13	Germany	KY260879	658[0n]	BOLD:AAN3553
Polistes albellus	BC ZSM HYM 15575	GBACU3795-13	Germany	KY260885	624[0n]	BOLD:AAN3553
Polistes albellus	BC ZSM HYM 22706	BCHYM6271-15	Kazakhstan	KY260884	658[0n]	BOLD:AAN3553
Polistes albellus	BC ZSM HYM 22709	BCHYM6274-15	Kazakhstan	KY260880	658[0n]	BOLD:AAN3553
Polistes albellus	BC ZSM HYM 15513	GBACU3733-13	Switzerland	KY260881	658[0n]	BOLD:AAN3553
Polistes albellus	BC ZSM HYM 15514	GBACU3734-13	Switzerland	KY260882	658[0n]	BOLD:AAN3553
Polistes associus	BC ZSM HYM 15519	GBACU3739-13	Croatia	KY260888	658[0n]	BOLD:ACG2253
Polistes associus	BC ZSM HYM 15520	GBACU3740-13	Croatia	KY260891	634[0n]	BOLD:ACG2253
Polistes associus	BC ZSM HYM 15525	GBACU3745-13	Croatia	KY260889	658[0n]	BOLD:ACG2253
Polistes associus	BC ZSM HYM 22058	BCHYM4863-14	Croatia	KY260890	658[1n]	BOLD:ACG2253
Polistes associus	BC ZSM HYM 22059	BCHYM4864-14	Croatia	KY260886	658[0n]	BOLD:ACG2253
Polistes associus	BC ZSM HYM 22060	BCHYM4865-14	Croatia	KY260892	658[0n]	BOLD:ACG2253
Polistes associus	BC ZSM HYM 15524	GBACU3744-13	Italy	KY260887	316[1n]	BOLD:ACG2253
Polistes atrimandibularis	BC ZSM HYM 05019	FBACA364-10	Italy	HQ947798	658[0n]	BOLD:AAN4297
Polistes atrimandibularis	BC ZSM HYM 05020	FBACA365-10	Italy	HQ947799	658[0n]	BOLD:AAN4297
Polistes austroccidentalis	BC ZSM HYM 15527	GBACU3747-13	France	KY260896	654[0n]	BOLD:ACG1677
Polistes austroccidentalis	BC ZSM HYM 22041	BCHYM4846-14	Morocco	KY260897	658[0n]	BOLD:ACG1677
Polistes austroccidentalis	BC ZSM HYM 22042	BCHYM4847-14	Morocco	KY260894	658[0n]	BOLD:ACG1677
Polistes austroccidentalis	GBOL19137	BCHYM15022-16	Morocco	KY260895	642[0n]	BOLD:ACG1677
Polistes austroccidentalis	BC ZSM HYM 22339	BCHYM5144-14	Switzerland	KY260893	658[0n]	BOLD:ACG1677
Polistes biglumis	BC ZSM HYM 05005	FBACA350-10	Germany	HQ947786	658[0n]	BOLD:AAN3552
Polistes biglumis	BC ZSM HYM 05006	FBACA351-10	Germany	HQ947787	658[0n]	BOLD:AAN3552
Polistes biglumis	BC ZSM HYM 05007	FBACA352-10	Germany	HQ947788	658[0n]	BOLD:AAN3552
Polistes biglumis	BC ZSM HYM 15561	GBACU3781-13	Germany	KY260901	658[0n]	BOLD:AAN3552
Polistes biglumis	BC ZSM HYM 15562	GBACU3782-13	Germany	KY260903	605[0n]	BOLD:AAN3552
Polistes biglumis	BC ZSM HYM 05008	FBACA353-10	Italy	HQ947789	620[0n]	BOLD:AAN3552
Polistes biglumis	BC ZSM HYM 15576	GBACU3796-13	Italy	KY260911	658[0n]	BOLD:AAN3552
Polistes biglumis	BC ZSM HYM 16995	GBACU3315-13	Italy	KY260906	658[0n]	BOLD:AAN3552
Polistes biglumis	BC ZSM HYM 16996	GBACU3316-13	Italy	KY260914	658[0n]	BOLD:AAN3552
Polistes biglumis	BC ZSM HYM 16997	GBACU3317-13	Italy	KY260908	658[0n]	BOLD:AAN3552
Polistes biglumis	BC ZSM HYM 19400	BCHYM1350-13	Italy	KY260902	658[0n]	BOLD:AAN3552
Polistes biglumis	BC ZSM HYM 19401	BCHYM1351-13	Italy	KY260912	658[0n]	BOLD:AAN3552
Polistes biglumis	BC ZSM HYM 19402	BCHYM1352-13	Italy	KY260898	658[0n]	BOLD:AAN3552
Polistes biglumis	BC ZSM HYM 19403	BCHYM1353-13	Italy	KY260899	658[0n]	BOLD:AAN3552
Polistes biglumis	BC ZSM HYM 19404	BCHYM1354-13	Italy	KY260910	658[0n]	BOLD:AAN3552
Polistes biglumis	BC ZSM HYM 19405	BCHYM1355-13	Italy	KY260913	658[0n]	BOLD:AAN3552
Polistes biglumis	BC ZSM HYM 19929	BCHYM1594-14	Italy	KY260900	658[0n]	BOLD:AAN3552
Polistes biglumis	BC ZSM HYM 24654	BCHYM12114-15	Italy	KY260909	658[0n]	BOLD:AAN3552
Polistes biglumis	BC ZSM HYM 24655	BCHYM12115-15	Italy	KY260905	658[0n]	BOLD:AAN3552
Polistes biglumis	BC ZSM HYM 24656	BCHYM12116-15	Italy	KY260904	658[0n]	BOLD:AAN3552
Polistes biglumis	BC ZSM HYM 24657	BCHYM12117-15	Italy	KY260907	658[0n]	BOLD:AAN3552
Polistes bischoffi	BC ZSM HYM 15554	GBACU3774-13	Croatia	KY260920	658[1n]	BOLD:ACG2292
Polistes bischoffi	BC ZSM HYM 24024	BCHYM9869-15	France	KY260916	658[0n]	BOLD:ACG2292
Polistes bischoffi	BC ZSM HYM 22707	BCHYM6272-15	Spain	KY260917	658[0n]	BOLD:ACG2292
Polistes bischoffi	BC ZSM HYM 22708	BCHYM6273-15	Spain	KY260918	658[0n]	BOLD:ACG2292
Polistes bischoffi	BC ZSM HYM 22710	BCHYM6275-15	Spain	KY260922	658[0n]	BOLD:ACG2292
Polistes bischoffi	BC ZSM HYM 22711	BCHYM6276-15	Spain	KY260921	658[0n]	BOLD:ACG2292
Polistes bischoffi	BC ZSM HYM 22340	BCHYM5145-14	Switzerland	KY260915	658[0n]	BOLD:ACG2292
Polistes bischoffi	BC ZSM HYM 22341	BCHYM5146-14	Switzerland	KY260919	658[0n]	BOLD:ACG2292
Polistes bischoffi	BC ZSM HYM 22342	BCHYM5147-14	Switzerland	KY260923	658[0n]	BOLD:ACG2292
Polistes bischoffi	BC ZSM HYM 22343	BCHYM5148-14	Switzerland	KY260925	658[0n]	BOLD:ACG2292
Polistes bischoffi	BC ZSM HYM 24025	BCHYM9870-15	Switzerland	KY260924	630[0n]	BOLD:ACG2292
Polistes bucharensis	GBOL18674	BCHYM12923-16	Azerbaijan	KY260932	658[0n]	BOLD:ACM7975
Polistes bucharensis	GBOL18676	BCHYM12925-16	Azerbaijan	KY260933	658[0n]	BOLD:ACM7975
Polistes bucharensis	GBOL18675	BCHYM12924-16	Azerbaijan	KY260937	658[0n]	BOLD:ACR2719
Polistes bucharensis	BC ZSM HYM 20049	BCHYM2094-14	Cyprus	KY260938	664[0n]	BOLD:ACM7975
Polistes bucharensis	BC ZSM HYM 20050	BCHYM2095-14	Cyprus	KY260931	658[0n]	BOLD:ACM7975
Polistes bucharensis	BC ZSM HYM 20056	BCHYM2101-14	Cyprus	KY260934	664[0n]	BOLD:ACM7975
Polistes bucharensis	BC ZSM HYM 20057	BCHYM2102-14	Cyprus	KY260930	664[0n]	BOLD:ACM7975
Polistes bucharensis	BC ZSM HYM 21002	BCHYM2952-14	Cyprus	KY260927	658[0n]	BOLD:ACM7975
Polistes bucharensis	BC ZSM HYM 21003	BCHYM2953-14	Cyprus	KY260936	658[0n]	BOLD:ACM7975
Polistes bucharensis	BC ZSM HYM 21004	BCHYM2954-14	Cyprus	KY260926	658[0n]	BOLD:ACM7975
Polistes bucharensis	BC ZSM HYM 24642	BCHYM12102-15	Greece	KY260935	658[0n]	BOLD:ACY7463
Polistes bucharensis	BC ZSM HYM 24644	BCHYM12104-15	Greece	KY260929	658[0n]	BOLD:ACY7463
Polistes bucharensis	BC ZSM HYM 24985	BCHYM12445-15	Greece	KY260928	629[0n]	BOLD:ACY7463
Polistes dominula	GBOL18677	BCHYM12926-16	Azerbaijan	KY260955	658[0n]	BOLD:AAB7105
Polistes dominula	BC ZSM HYM 22045	BCHYM4850-14	Croatia	KY260995	658[0n]	BOLD:AAB7105
Polistes dominula	BC ZSM HYM 22046	BCHYM4851-14	Croatia	KY260951	658[0n]	BOLD:AAB7105
Polistes dominula	BC ZSM HYM 22047	BCHYM4852-14	Croatia	KY260950	658[0n]	BOLD:AAB7105
Polistes dominula	BC ZSM HYM 05003	FBACA348-10	France	HQ947784	658[0n]	BOLD:AAA9495
Polistes dominula	BC ZSM HYM 00044	FBHAP139-09	Germany	KY260980	658[0n]	BOLD:AAA9495
Polistes dominula	BC ZSM HYM 10206	FBACB801-11	Germany	KY260978	658[0n]	BOLD:AAA9495
Polistes dominula	BC ZSM HYM 15506	GBACU3726-13	Germany	KY260990	658[0n]	BOLD:AAA9495
Polistes dominula	BC ZSM HYM 15565	GBACU3785-13	Germany	KY260991	658[0n]	BOLD:AAA9495
Polistes dominula	BC ZSM HYM 19389	BCHYM1339-13	Germany	KY260948	658[0n]	BOLD:AAA9495
Polistes dominula	BC ZSM HYM 21992	BCHYM4607-14	Germany	KY260963	658[0n]	BOLD:AAA9495
Polistes dominula	BC ZSM HYM 21993	BCHYM4608-14	Germany	KY260986	658[0n]	BOLD:AAA9495
Polistes dominula	BC ZSM HYM 24649	BCHYM12109-15	Germany	KY260956	658[0n]	BOLD:AAA9495
Polistes dominula	BC ZSM HYM 24650	BCHYM12110-15	Germany	KY260965	602[0n]	BOLD:AAA9495
Polistes dominula	BC ZSM HYM 24651	BCHYM12111-15	Germany	KY260987	658[0n]	BOLD:AAA9495
Polistes dominula	BC ZSM HYM 24652	BCHYM12112-15	Germany	KY260985	658[0n]	BOLD:AAA9495
Polistes dominula	BC ZSM HYM 24660	BCHYM12120-15	Germany	KY260949	658[0n]	BOLD:AAA9495
Polistes dominula	BC ZSM HYM 24662	BCHYM12122-15	Germany	KY260960	658[0n]	BOLD:AAA9495
Polistes dominula	BC ZSM HYM 05001	FBACA346-10	Germany	HQ947782	658[0n]	BOLD:AAB7105
Polistes dominula	BC ZSM HYM 05002	FBACA347-10	Germany	HQ947783	658[0n]	BOLD:AAB7105
Polistes dominula	BC ZSM HYM 05004	FBACA349-10	Germany	HQ947785	658[0n]	BOLD:AAB7105
Polistes dominula	BC ZSM HYM 08258	FBACB658-11	Germany	KY260967	658[0n]	BOLD:AAB7105
Polistes dominula	BC ZSM HYM 10205	FBACB800-11	Germany	KY260973	658[0n]	BOLD:AAB7105
Polistes dominula	BC ZSM HYM 15505	GBACU3725-13	Germany	KY260979	658[0n]	BOLD:AAB7105
Polistes dominula	BC ZSM HYM 15507	GBACU3727-13	Germany	KY260968	658[0n]	BOLD:AAB7105
Polistes dominula	BC ZSM HYM 15509	GBACU3729-13	Germany	KY260977	658[0n]	BOLD:AAB7105
Polistes dominula	BC ZSM HYM 19385	BCHYM1335-13	Germany	KY260972	658[0n]	BOLD:AAB7105
Polistes dominula	BC ZSM HYM 19386	BCHYM1336-13	Germany	KY260946	658[0n]	BOLD:AAB7105
Polistes dominula	BC ZSM HYM 19387	BCHYM1337-13	Germany	KY260943	658[0n]	BOLD:AAB7105
Polistes dominula	BC ZSM HYM 19388	BCHYM1338-13	Germany	KY260988	658[0n]	BOLD:AAB7105
Polistes dominula	BC ZSM HYM 19390	BCHYM1340-13	Germany	KY260974	658[0n]	BOLD:AAB7105
Polistes dominula	BC ZSM HYM 19391	BCHYM1341-13	Germany	KY260966	658[0n]	BOLD:AAB7105
Polistes dominula	BC ZSM HYM 19392	BCHYM1342-13	Germany	KY260992	658[0n]	BOLD:AAB7105
Polistes dominula	BC ZSM HYM 19393	BCHYM1343-13	Germany	KY260971	658[0n]	BOLD:AAB7105
Polistes dominula	BC ZSM HYM 19394	BCHYM1344-13	Germany	KY260976	658[0n]	BOLD:AAB7105
Polistes dominula	BC ZSM HYM 19395	BCHYM1345-13	Germany	KY260981	658[0n]	BOLD:AAB7105
Polistes dominula	GBOL18936	BCHYM13111-16	Greece	KY260969	646[0n]	BOLD:AAB7105
Polistes dominula	GBOL18938	BCHYM13113-16	Greece	KY260962	698[0n]	BOLD:AAB7105
Polistes dominula	BC ZSM HYM 10201	FBACB796-11	Italy	KY260975	658[0n]	BOLD:AAB7105
Polistes dominula	BC ZSM HYM 10202	FBACB797-11	Italy	KY260958	658[0n]	BOLD:AAB7105
Polistes dominula	BC ZSM HYM 10203	FBACB798-11	Italy	KY260970	658[0n]	BOLD:AAB7105
Polistes dominula	BC ZSM HYM 10204	FBACB799-11	Italy	KY260989	658[0n]	BOLD:AAB7105
Polistes dominula	BC ZSM HYM 19381	BCHYM1331-13	Italy	KY260964	647[0n]	BOLD:AAB7105
Polistes dominula	BC ZSM HYM 19382	BCHYM1332-13	Italy	KY260993	658[0n]	BOLD:AAB7105
Polistes dominula	BC ZSM HYM 19383	BCHYM1333-13	Italy	KY260984	658[0n]	BOLD:AAB7105
Polistes dominula	BC ZSM HYM 19384	BCHYM1334-13	Italy	KY260982	658[0n]	BOLD:AAB7105
Polistes dominula	BC ZSM HYM 24646	BCHYM12106-15	Italy	KY260954	658[0n]	BOLD:AAB7105
Polistes dominula	BC ZSM HYM 24647	BCHYM12107-15	Italy	KY260959	658[0n]	BOLD:AAB7105
Polistes dominula	BC ZSM HYM 24648	BCHYM12108-15	Italy	KY260983	658[0n]	BOLD:AAB7105
Polistes dominula	BC ZSM HYM 24653	BCHYM12113-15	Italy	KY260944	658[0n]	BOLD:AAB7105
Polistes dominula	BC ZSM HYM 22048	BCHYM4853-14	Morocco	KY260957	658[0n]	BOLD:ACR3974
Polistes dominula	BC ZSM HYM 22049	BCHYM4854-14	Morocco	KY260941	658[0n]	BOLD:ACR3974
Polistes dominula	BC ZSM HYM 22050	BCHYM4855-14	Morocco	KY260945	658[0n]	BOLD:ACR3974
Polistes dominula	BC ZSM HYM 22051	BCHYM4856-14	Morocco	KY260953	658[0n]	BOLD:ACR3974
Polistes dominula	BC ZSM HYM 22052	BCHYM4857-14	Morocco	KY260940	658[0n]	BOLD:ACR3974
Polistes dominula	BC ZSM HYM 22053	BCHYM4858-14	Morocco	KY260939	632[0n]	BOLD:ACR3974
Polistes dominula	BC ZSM HYM 22054	BCHYM4859-14	Morocco	KY260996	658[0n]	BOLD:ACR3974
Polistes dominula	BC ZSM HYM 22055	BCHYM4860-14	Morocco	KY260942	658[0n]	BOLD:ACR3974
Polistes dominula	BC ZSM HYM 22056	BCHYM4861-14	Morocco	KY260952	658[0n]	BOLD:ACR3974
Polistes dominula	BC ZSM HYM 22057	BCHYM4862-14	Morocco	KY260994	658[0n]	BOLD:ACR3974
Polistes dominula	GBOL19134	BCHYM15019-16	Morocco	KY260961	539[0n]	BOLD:ACR3974
Polistes dominula	BC ZSM HYM 22344	BCHYM5149-14	Switzerland	KY260947	658[0n]	BOLD:AAB7105
Polistes foederatus	GBOL18468	GBMIX2921-16	Azerbaijan	KY260999	658[0n]	BOLD:ACG2291
Polistes foederatus	GBOL18469	GBMIX2922-16	Azerbaijan	KY260998	658[0n]	BOLD:ACG2291
Polistes foederatus	BC ZSM HYM 22065	BCHYM4870-14	Croatia	KY261004	658[0n]	BOLD:ACG2291
Polistes foederatus	BC ZSM HYM 22066	BCHYM4871-14	Croatia	KY261003	658[0n]	BOLD:ACG2291
Polistes foederatus	BC ZSM HYM 22067	BCHYM4872-14	Croatia	KY261006	658[0n]	BOLD:ACG2291
Polistes foederatus	BC ZSM HYM 22068	BCHYM4873-14	Croatia	KY260997	658[0n]	BOLD:ACG2291
Polistes foederatus	BC ZSM HYM 22069	BCHYM4874-14	Croatia	KY261005	658[0n]	BOLD:ACG2291
Polistes foederatus	BC ZSM HYM 22712	BCHYM6277-15	Croatia	KY261010	658[0n]	BOLD:ACG2291
Polistes foederatus	BC ZSM HYM 22713	BCHYM6278-15	Croatia	KY261015	658[0n]	BOLD:ACG2291
Polistes foederatus	BC ZSM HYM 22714	BCHYM6279-15	Croatia	KY261009	658[0n]	BOLD:ACG2291
Polistes foederatus	BC ZSM HYM 13475	GBCHA650-13	Greece	KY261016	583[0n]	BOLD:ACG2291
Polistes foederatus	BC ZSM HYM 22331	BCHYM5136-14	Greece	KY261017	658[0n]	BOLD:ACG2291
Polistes foederatus	BC ZSM HYM 24641	BCHYM12101-15	Greece	KY261011	658[0n]	BOLD:ACG2291
Polistes foederatus	BC ZSM HYM 24643	BCHYM12103-15	Greece	KY261012	658[0n]	BOLD:ACG2291
Polistes foederatus	BC ZSM HYM 24645	BCHYM12105-15	Greece	KY261014	658[0n]	BOLD:ACG2291
Polistes foederatus	BC ZSM HYM 24983	BCHYM12443-15	Greece	KY261002	658[0n]	BOLD:ACG2291
Polistes foederatus	BC ZSM HYM 24984	BCHYM12444-15	Greece	KY261001	658[0n]	BOLD:ACG2291
Polistes foederatus	GBOL18411	GBMIX2864-16	Greece	KY261000	658[0n]	BOLD:ACG2291
Polistes foederatus	BC ZSM HYM 15539	GBACU3759-13	Italy	KY261008	555[0n]	BOLD:ACG2291
Polistes foederatus	BC ZSM HYM 15542	GBACU3762-13	Italy	KY261013	553[0n]	BOLD:ACG2291
Polistes foederatus	BC ZSM HYM 15560	GBACU3780-13	Turkey	KY261007	658[0n]	BOLD:ACG2291
Polistes gallicus	BC ZSM HYM 13470	GBCHA645-13	Croatia	KY261030	658[0n]	BOLD:AAN3302
Polistes gallicus	BC ZSM HYM 13471	GBCHA646-13	Croatia	KY261026	656[0n]	BOLD:AAN3302
Polistes gallicus	BC ZSM HYM 13472	GBCHA647-13	Croatia	KY261028	658[0n]	BOLD:AAN3302
Polistes gallicus	BC ZSM HYM 13477	GBCHA652-13	Croatia	KY261025	658[0n]	BOLD:AAN3302
Polistes gallicus	BC ZSM HYM 15516	GBACU3736-13	Croatia	KY261029	614[0n]	BOLD:AAN3302
Polistes gallicus	BC ZSM HYM 15517	GBACU3737-13	Croatia	KY261023	622[0n]	BOLD:AAN3302
Polistes gallicus	BC ZSM HYM 05021	FBACA366-10	Italy	HQ947800	658[0n]	BOLD:AAN3302
Polistes gallicus	BC ZSM HYM 05023	FBACA368-10	Italy	HQ947802	658[0n]	BOLD:AAN3302
Polistes gallicus	BC ZSM HYM 05024	FBACA369-10	Italy	HQ947803	658[0n]	BOLD:AAN3302
Polistes gallicus	BC ZSM HYM 10208	FBACB803-11	Italy	KY261019	658[0n]	BOLD:AAN3302
Polistes gallicus	BC ZSM HYM 15541	GBACU3761-13	Italy	KY261027	658[0n]	BOLD:AAN3302
Polistes gallicus	BC ZSM HYM 15543	GBACU3763-13	Italy	KY261018	658[0n]	BOLD:AAN3302
Polistes gallicus	GBOL19135	BCHYM15020-16	Morocco	KY261033	487[0n]	BOLD:AAN3302
Polistes gallicus	GBOL19136	BCHYM15021-16	Morocco	KY261032	452[0n]	BOLD:AAN3302
Polistes gallicus	BC ZSM HYM 15548	GBACU3768-13	Portugal	KY261021	658[0n]	BOLD:AAN3302
Polistes gallicus	BC ZSM HYM 15549	GBACU3769-13	Portugal	KY261024	658[0n]	BOLD:AAN3302
Polistes gallicus	BC ZSM HYM 17494	GBACU3529-13	Spain	KY261034	658[0n]	BOLD:AAN3302
Polistes gallicus	BC ZSM HYM 17498	GBACU3533-13	Spain	KY261031	658[0n]	BOLD:AAN3302
Polistes gallicus	BC ZSM HYM 22657	BCHYM6412-15	Spain	KY261020	670[0n]	BOLD:AAN3302
Polistes gallicus	BC ZSM HYM 22658	BCHYM6413-15	Spain	KY261022	670[0n]	BOLD:AAN3302
Polistes maroccanus	BC ZSM HYM 22043	BCHYM4848-14	Morocco	KY261035	603[0n]	BOLD:ACR4397
Polistes mongolicus	GBOL18470	GBMIX2923-16	Azerbaijan	KY261067	658[0n]	BOLD:AAN3303
Polistes mongolicus	GBOL18471	GBMIX2924-16	Azerbaijan	KY261069	658[0n]	BOLD:AAN3303
Polistes mongolicus	GBOL18472	GBMIX2925-16	Azerbaijan	KY261070	658[0n]	BOLD:AAN3303
Polistes mongolicus	GBOL18473	GBMIX2926-16	Azerbaijan	KY261071	658[0n]	BOLD:AAN3303
Polistes mongolicus	GBOL18474	GBMIX2927-16	Azerbaijan	KY261073	658[0n]	BOLD:AAN3303
Polistes mongolicus	GBOL18475	GBMIX2928-16	Azerbaijan	KY261074	658[0n]	BOLD:AAN3303
Polistes mongolicus	GBOL18476	GBMIX2929-16	Azerbaijan	KY261078	658[0n]	BOLD:AAN3303
Polistes mongolicus	GBOL18477	GBMIX2930-16	Azerbaijan	KY261080	658[0n]	BOLD:AAN3303
Polistes mongolicus	GBOL18478	GBMIX2931-16	Azerbaijan	KY261081	658[0n]	BOLD:AAN3303
Polistes mongolicus	GBOL18479	GBMIX2932-16	Azerbaijan	KY261082	658[0n]	BOLD:AAN3303
Polistes mongolicus	BC ZSM HYM 13466	GBCHA641-13	Croatia	KY261065	658[0n]	BOLD:AAN3303
Polistes mongolicus	BC ZSM HYM 13467	GBCHA642-13	Croatia	KY261083	658[0n]	BOLD:AAN3303
Polistes mongolicus	BC ZSM HYM 13468	GBCHA643-13	Croatia	KY261076	658[0n]	BOLD:AAN3303
Polistes mongolicus	BC ZSM HYM 15515	GBACU3735-13	Croatia	KY261049	658[0n]	BOLD:AAN3303
Polistes mongolicus	BC ZSM HYM 15518	GBACU3738-13	Croatia	KY261079	658[0n]	BOLD:AAN3303
Polistes mongolicus	BC ZSM HYM 15531	GBACU3751-13	Croatia	KY261058	623[0n]	BOLD:AAN3303
Polistes mongolicus	BC ZSM HYM 15533	GBACU3753-13	Croatia	KY261046	658[0n]	BOLD:AAN3303
Polistes mongolicus	BC ZSM HYM 15536	GBACU3756-13	Croatia	KY261050	580[0n]	BOLD:AAN3303
Polistes mongolicus	BC ZSM HYM 15555	GBACU3775-13	Croatia	KY261052	658[0n]	BOLD:AAN3303
Polistes mongolicus	BC ZSM HYM 22070	BCHYM4875-14	Croatia	KY261064	658[0n]	BOLD:AAN3303
Polistes mongolicus	BC ZSM HYM 22071	BCHYM4876-14	Croatia	KY261063	658[0n]	BOLD:AAN3303
Polistes mongolicus	BC ZSM HYM 22072	BCHYM4877-14	Croatia	KY261066	658[0n]	BOLD:AAN3303
Polistes mongolicus	BC ZSM HYM 15535	GBACU3755-13	Croatia	KY261040	281[0n]	NONE
Polistes mongolicus	BC ZSM HYM 15545	GBACU3765-13	Cyprus	KY261077	658[0n]	BOLD:AAN3303
Polistes mongolicus	BC ZSM HYM 15558	GBACU3778-13	Cyprus	KY261054	658[0n]	BOLD:AAN3303
Polistes mongolicus	BC ZSM HYM 17495	GBACU3530-13	Cyprus	KY261042	490[1n]	BOLD:AAN3303
Polistes mongolicus	BC ZSM HYM 17496	GBACU3531-13	Cyprus	KY261051	658[0n]	BOLD:AAN3303
Polistes mongolicus	BC ZSM HYM 20046	BCHYM2091-14	Cyprus	KY261038	664[0n]	BOLD:AAN3303
Polistes mongolicus	BC ZSM HYM 20047	BCHYM2092-14	Cyprus	KY261056	664[0n]	BOLD:AAN3303
Polistes mongolicus	BC ZSM HYM 20048	BCHYM2093-14	Cyprus	KY261041	664[0n]	BOLD:AAN3303
Polistes mongolicus	BC ZSM HYM 20051	BCHYM2096-14	Cyprus	KY261075	664[0n]	BOLD:AAN3303
Polistes mongolicus	BC ZSM HYM 20052	BCHYM2097-14	Cyprus	KY261039	664[0n]	BOLD:AAN3303
Polistes mongolicus	BC ZSM HYM 20053	BCHYM2098-14	Cyprus	KY261084	664[0n]	BOLD:AAN3303
Polistes mongolicus	BC ZSM HYM 20054	BCHYM2099-14	Cyprus	KY261068	664[0n]	BOLD:AAN3303
Polistes mongolicus	BC ZSM HYM 20055	BCHYM2100-14	Cyprus	KY261045	664[0n]	BOLD:AAN3303
Polistes mongolicus	BC ZSM HYM 21029	BCHYM2979-14	Cyprus	KY261037	658[0n]	BOLD:AAN3303
Polistes mongolicus	BC ZSM HYM 21030	BCHYM2980-14	Cyprus	KY261060	658[0n]	BOLD:AAN3303
Polistes mongolicus	BC ZSM HYM 21033	BCHYM2983-14	Cyprus	KY261061	658[0n]	BOLD:AAN3303
Polistes mongolicus	BC ZSM HYM 21034	BCHYM2984-14	Cyprus	KY261085	658[0n]	BOLD:AAN3303
Polistes mongolicus	BC ZSM HYM 21035	BCHYM2985-14	Cyprus	KY261043	658[0n]	BOLD:AAN3303
Polistes mongolicus	BC ZSM HYM 21036	BCHYM2986-14	Cyprus	KY261055	658[0n]	BOLD:AAN3303
Polistes mongolicus	BC ZSM HYM 21037	BCHYM2987-14	Cyprus	KY261062	658[0n]	BOLD:AAN3303
Polistes mongolicus	BC ZSM HYM 21038	BCHYM2988-14	Cyprus	KY261059	658[0n]	BOLD:AAN3303
Polistes mongolicus	BC ZSM HYM 21039	BCHYM2989-14	Cyprus	KY261072	658[0n]	BOLD:AAN3303
Polistes mongolicus	BC ZSM HYM 21068	BCHYM3018-14	Cyprus	KY261047	658[0n]	BOLD:AAN3303
Polistes mongolicus	BC ZSM HYM 21073	BCHYM3023-14	Cyprus	KY261048	658[0n]	BOLD:AAN3303
Polistes mongolicus	BC ZSM HYM 13465	GBCHA640-13	Greece	KY261053	601[0n]	BOLD:AAN3303
Polistes mongolicus	BC ZSM HYM 17497	GBACU3532-13	Greece	KY261057	624[0n]	BOLD:AAN3303
Polistes mongolicus	BC ZSM HYM 05022	FBACA367-10	Italy	HQ947801	658[0n]	BOLD:AAN3303
Polistes mongolicus	BC ZSM HYM 15551	GBACU3771-13	Turkey	KY261044	620[0n]	BOLD:AAN3303
Polistes mongolicus	BC ZSM HYM 15553	GBACU3773-13	Turkey	KY261036	658[0n]	BOLD:AAN3303
Polistes nimpha	BC ZSM HYM 04962	FBACA307-10	Germany	KY261087	620[3n]	BOLD:AAL0103
Polistes nimpha	BC ZSM HYM 04998	FBACA343-10	Germany	KY261105	615[2n]	BOLD:AAL0103
Polistes nimpha	BC ZSM HYM 08256	FBACB656-11	Germany	KY261107	627[3n]	BOLD:AAL0103
Polistes nimpha	BC ZSM HYM 08257	FBACB657-11	Germany	KY261092	623[5n]	BOLD:AAL0103
Polistes nimpha	BC ZSM HYM 09882	FBACB952-11	Germany	KY261101	577[0n]	BOLD:AAL0103
Polistes nimpha	BC ZSM HYM 14012	GBACU1757-12	Germany	KY261104	658[0n]	BOLD:AAL0103
Polistes nimpha	BC ZSM HYM 14407	GBACU1962-12	Germany	KY261097	658[0n]	BOLD:AAL0103
Polistes nimpha	BC ZSM HYM 19397	BCHYM1347-13	Germany	KY261102	658[0n]	BOLD:AAL0103
Polistes nimpha	BC ZSM HYM 19398	BCHYM1348-13	Germany	KY261096	658[0n]	BOLD:AAL0103
Polistes nimpha	BC ZSM HYM 19399	BCHYM1349-13	Germany	KY261109	658[0n]	BOLD:AAL0103
Polistes nimpha	BC ZSM HYM 21990	BCHYM4605-14	Germany	KY261108	622[0n]	BOLD:AAL0103
Polistes nimpha	BC ZSM HYM 21991	BCHYM4606-14	Germany	KY261099	622[0n]	BOLD:AAL0103
Polistes nimpha	BC ZSM HYM 24661	BCHYM12121-15	Germany	KY261086	658[0n]	BOLD:AAL0103
Polistes nimpha	BC ZSM HYM 14013	GBACU1758-12	Germany	KY261091	602[0n]	BOLD:ACC1661
Polistes nimpha	BC ZSM HYM 14014	GBACU1759-12	Germany	KY261113	658[0n]	BOLD:ACC1661
Polistes nimpha	BC ZSM HYM 14017	GBACU1762-12	Germany	KY261110	658[1n]	BOLD:ACC1661
Polistes nimpha	BC ZSM HYM 14018	GBACU1763-12	Germany	KY261088	658[0n]	BOLD:ACC1661
Polistes nimpha	BC ZSM HYM 04999	FBACA344-10	Germany	KY261090	270[0n]	NONE
Polistes nimpha	BC ZSM HYM 05000	FBACA345-10	Germany	KY261112	237[2n]	NONE
Polistes nimpha	BC ZSM HYM 09881	FBACB951-11	Germany	KY261093	658[12n]	NONE
Polistes nimpha	BC ZSM HYM 22716	BCHYM6281-15	Greece	KY261111	658[0n]	BOLD:AAL0103
Polistes nimpha	BC ZSM HYM 22717	BCHYM6282-15	Greece	KY261098	618[8n]	NONE
Polistes nimpha	BC ZSM HYM 10207	FBACB802-11	Italy	KY261094	658[0n]	BOLD:AAL0103
Polistes nimpha	BC ZSM HYM 19396	BCHYM1346-13	Italy	KY261095	658[2n]	BOLD:AAL0103
Polistes nimpha	BC ZSM HYM 24035	BCHYM9880-15	Italy	KY261089	658[0n]	BOLD:AAL0103
Polistes nimpha	BC ZSM HYM 24659	BCHYM12119-15	Italy	KY261100	658[0n]	BOLD:AAL0103
Polistes nimpha	BC ZSM HYM 22336	BCHYM5141-14	Switzerland	KY261103	615[6n]	NONE
Polistes nimpha	BC ZSM HYM 22338	BCHYM5143-14	Switzerland	KY261106	494[7n]	NONE
Polistes semenowi	BC ZSM HYM 15528	GBACU3748-13	Italy	KY261114	622[0n]	BOLD:ACG1290
Polistes semenowi	BC ZSM HYM 15529	GBACU3749-13	Italy	KY261116	658[0n]	BOLD:ACG1290
Polistes semenowi	BC ZSM HYM 15530	GBACU3750-13	Italy	KY261118	658[0n]	BOLD:ACG1290
Polistes semenowi	BC ZSM HYM 22335	BCHYM5140-14	Italy	KY261115	624[0n]	BOLD:ACG1290
Polistes semenowi	BC ZSM HYM 24658	BCHYM12118-15	Italy	KY261119	658[0n]	BOLD:ACG1290
Polistes semenowi	BC ZSM HYM 22337	BCHYM5142-14	Switzerland	KY261117	658[0n]	BOLD:ACG1290
Polistes wattii	BC ZSM HYM 15511	GBACU3731-13	United Arab Emirates	KY261120	630[0n]	BOLD:AAE1384
Polistes wattii	BC ZSM HYM 15512	GBACU3732-13	United Arab Emirates	KY261122	658[0n]	BOLD:AAE1384
Polistes wattii	BC ZSM HYM 21074	BCHYM3024-14	United Arab Emirates	KY261123	658[0n]	BOLD:AAE1384
Polistes wattii	BC ZSM HYM 21075	BCHYM3025-14	United Arab Emirates	KY261121	658[0n]	BOLD:AAE1384
